# Supplementary material for: Analysis of Dot/Icm Type IVB Secretion System Subassemblies by Cryoelectron Tomography Reveals Conformational Changes Induced by DotB Binding
Source: PubMed Central journal article supplement (PMC7029142; doi:10.1128/mbio.03328-19), 2020-02-18

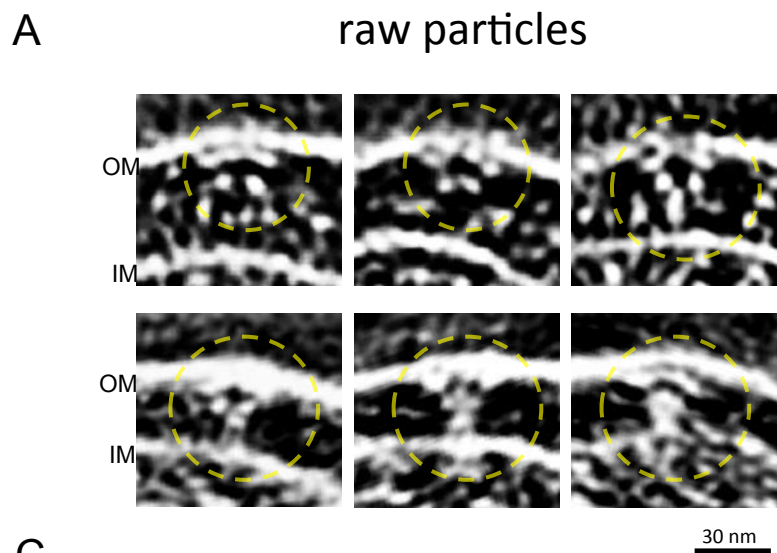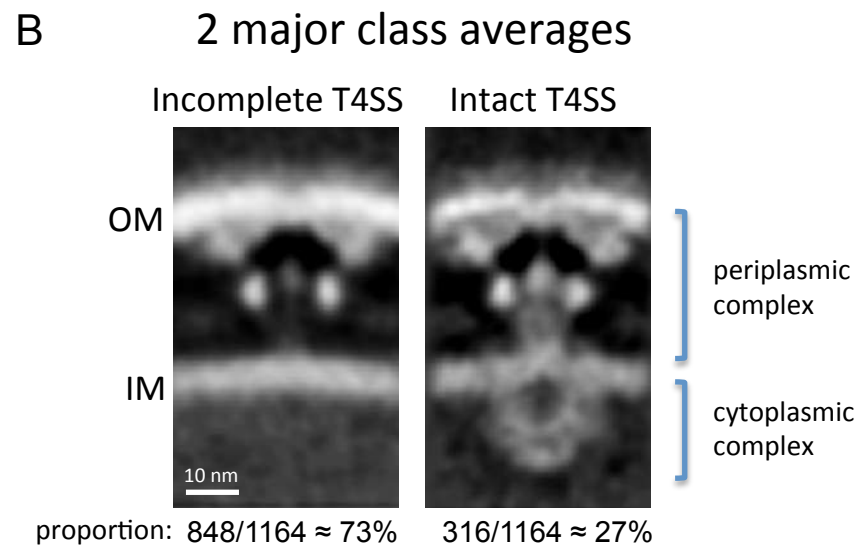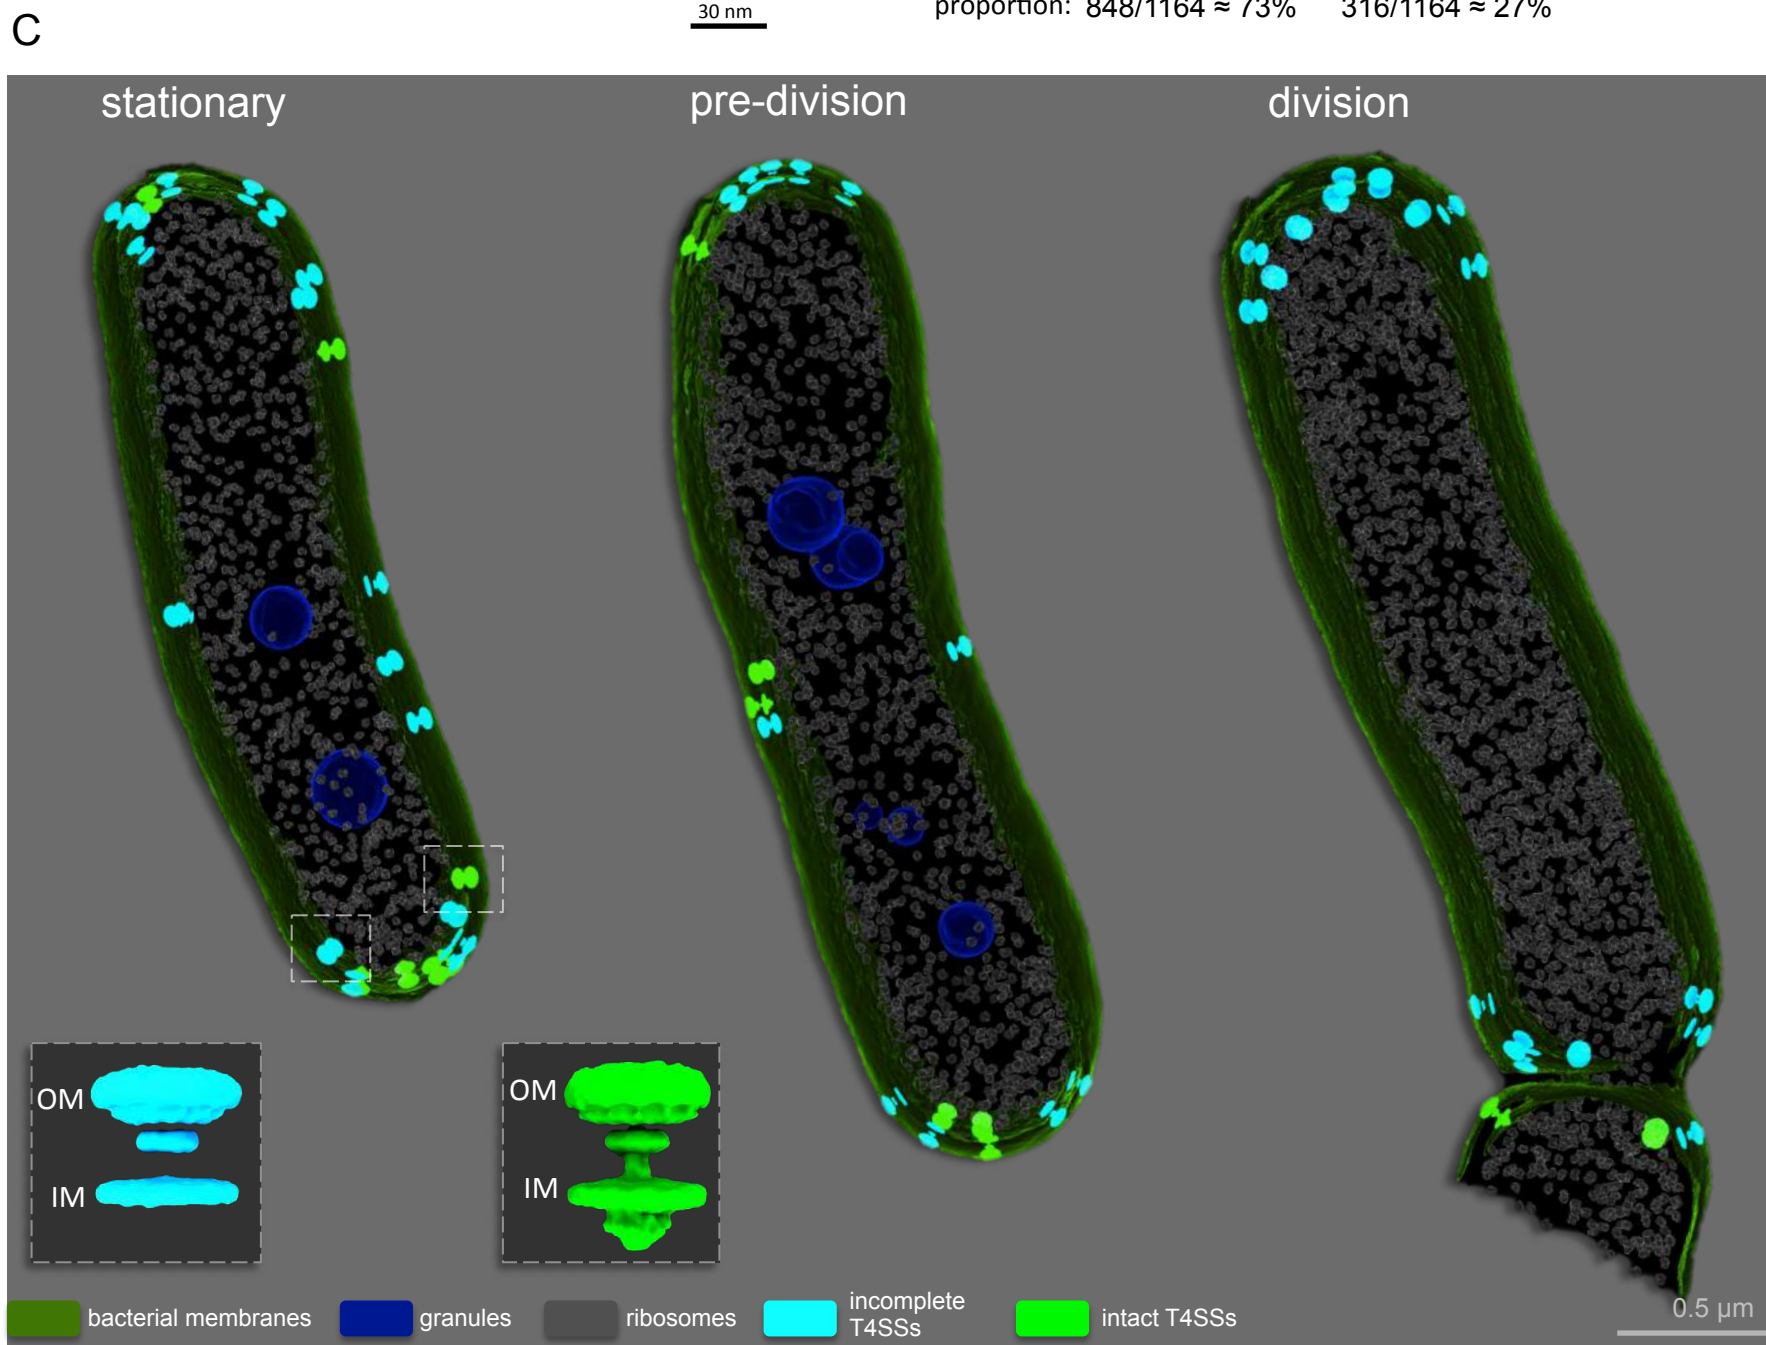

Supplement: mBio.03328-19-sf002.pdf [file mBio.03328-19-sf002.pdf]
