# Supplementary material for: Analysis of Dot/Icm Type IVB Secretion System Subassemblies by Cryoelectron Tomography Reveals Conformational Changes Induced by DotB Binding
Source: PubMed Central journal article supplement (PMC7029142; doi:10.1128/mbio.03328-19), 2020-02-18
Supplement: mBio.03328-19-sf003.pdf [file mBio.03328-19-sf003.pdf]

## Particle distributions

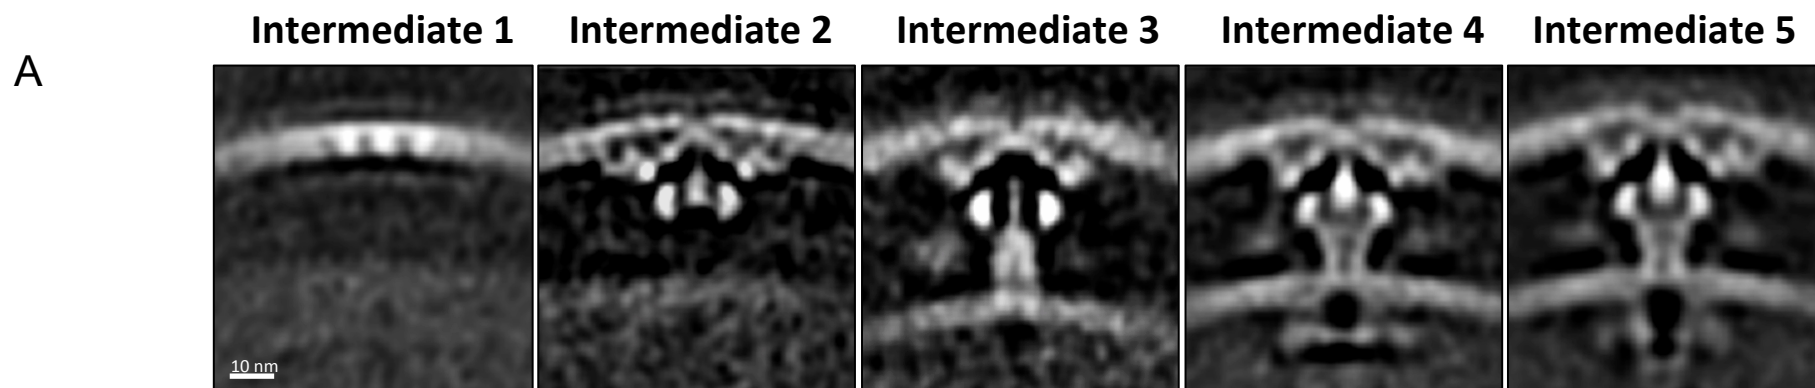

**B**

|                       |             |             |             |             |             |
|-----------------------|-------------|-------------|-------------|-------------|-------------|
| WT                    | 458 (26.8%) | 254 (14.9%) | 367 (21.5%) | 152 (8.9%)  | 475 (27.8%) |
| DotB <sub>E191K</sub> | 246 (20.5%) | 22 (1.8%)   | 123 (10.2%) | 315 (26.2%) | 495 (41.2%) |
| $\Delta dotB$         | 115 (22.2%) | 7 (1.3%)    | 99 (19.1%)  | 298 (57.4%) | 0 (0%)      |
| $\Delta dotL$         | 79 (19.7%)  | 8 (2%)      | 30 (7.5%)   | 120 (29.9%) | 164 (40.9%) |
| <b>Total</b>          | <b>898</b>  | <b>291</b>  | <b>619</b>  | <b>885</b>  | <b>1134</b> |
